# Supplementary material
Source: PubMed Central journal article supplement (PMC7549680)
Supplement: KRNB_A_1771944_SM3952.pdf [file KRNB_A_1771944_SM3952.pdf]

## Supplementary material

### Regulation of the p53 expression profile by hnRNP K under stress conditions

Agata Swiatkowska \*, Mariola Dutkiewicz, Piotr Machtel, Damian Janecki, Martyna Kabacinska, Paulina Żydowicz-Machtel, and Jerzy Ciesiołka \*

*Institute of Bioorganic Chemistry, Polish Academy of Sciences, Noskowskiego 12/14, 61-704 Poznan, Poland*

### Materials and Methods

#### Semi-quantitative RT-PCR

For RT-PCR, after transfection of MCF-7 cells with siRNA or DNA plasmids and treatment with specific stress agents, total RNA was isolated from the cells using TriReagent (Molecular Research Centre, Inc.) according to the manufacturer's protocol. RT-PCR was performed as previously described [10]. Briefly, the cDNA was prepared from 200 ng of RNA using 100 ng of oligo(dT)<sub>18</sub> primer and 100 units of SuperScript<sup>TM</sup> III reverse transcriptase (Invitrogen). Equal volumes of cDNA were used to amplify DNA fragments of hnRNP K and  $\beta$ -actin using the following primers: hnRNP K Forward: 5'-CCTATGACAGAAGAGGGAGAC-3'; hnRNP K Reverse: 5'-CCCTGTGGTTCATAAGCCATC-3';  $\beta$ -actin Forward: 5'-AGAGCAAGAGAGGCATCCTG-3';  $\beta$ -actin Reverse: 5'-CGACGTAGCACAGCTTCTCC-3'.

### Figure and table captions

**Fig S1: P1- $\Delta$ 40p53 RNA and P0- $\Delta$ 40p53 RNA affinity chromatography for untreated and 24 hour doxorubicin-treated MCF-7 cells.** Total cytoplasmic fractions and the protein eluates were incubated for 5 min at 95°C and then loaded on a 10% SDS-PAGE gel. After electrophoresis the gel was silver stained according to manufacturer's protocol (Pierce Silver Stain Kit).

**Fig S2: Distribution of proteins identified by P0- $\Delta$ 40p53 RNA affinity chromatography and MS analysis for untreated and 24 hour doxorubicin-treated MCF-7, HepG2 and HT-29 cells.**

**Fig S3: Downregulation of hnRNP K causes reduction of p53 expression at the protein level in MCF-7, HepG2 and HT-29 cells.** hnRNP K was depleted by specific siRNA used at the final concentrations of 10 nM or 50 nM. Twenty-four hours after transfection the cells were treated with doxorubicin at the final concentration of 0.5  $\mu\text{g}/\text{mL}$ . The levels of hnRNP K, p53 and GAPDH were determined by western blots. Each experiment was repeated twice.

**Fig S4: Semi-quantitative RT-PCR showing depletion of hnRNP K by siRNA in MCF-7 cells under various stress conditions.** The cells were transfected with specific hnRNP K or control siRNAs and 24 hours after transfection stress agents were added. The cells were exposed for 24 hours to doxorubicin (Dox, 0.5  $\mu\text{g}/\text{mL}$ ), tunicamycin (TU, 1.2  $\mu\text{M}$ ), thapsigargin (TA, 0.1  $\mu\text{M}$ ) and actinomycin (Act D, 5 nM), respectively. The RNA was isolated and RT-PCR was performed to detect hnRNP K and  $\beta$ -actin mRNA levels. The experiment was repeated at least twice.

**Fig S5: The p53 protein level in the cells treated with hnRNP K or control siRNAs under normal and ER stress conditions.** A representative western blot showing the levels of hnRNP K, p53 and GAPDH is shown.

**Fig S6: Semi-quantitative RT-PCR showing overexpression of hnRNP K in MCF-7 cells under genotoxic stress conditions.** (A) The cells were transfected with plasmid encoding hnRNP K-Flag (HK-F) or control plasmid encoding GFP. Then, 24 hours after transfection, the cells were exposed to doxorubicin (Dox, 0.5  $\mu\text{g}/\text{mL}$ ) for 24 hours. Total RNA was isolated and RT-PCR was performed to detect hnRNP K and  $\beta$ -actin mRNA levels. The experiment was repeated at least twice. (B) Expression of GFP in HepG2 and MCF-7 cells after 24 and 48 hours under normal conditions. Visualization was performed by fluorescence microscope Leica DM IL LED.

**Fig S7. Changes of p53 expression under ER stress in the presence of overexpressed hnRNP K in MCF-7 cells.** Following plasmid transfection (plasmids: C or HK-F) the cells were treated with tunicamycin (TU, 1.2  $\mu\text{M}$ ) or thapsigargin (TA, 0.1  $\mu\text{M}$ ) for 24 hours. The levels of p53, hnRNP K and GAPDH were determined by western blots. The experiment was repeated twice.

**Fig S8. Putative hnRNP K binding sites within the *TP53* gene promoter region and a part of the p53 coding sequence (nucleotides in positions -700 to -1 and those up to the second AUG codon, respectively).** Sites for hnRNP K interactions are marked in red, CpG islands are underlined and described below the sequence. Binding sequence motifs for some proteins which regulate p53

expression at the transcriptional level are marked in green above or below their recognized sequence motifs [40]. The P0 and P1 transcription start sites are marked by arrows.

**Table S1: Proteins that have been previously reported to interact with the 5'-terminal region of p53 mRNA.** The table presents our MS data from representative RNA-centric affinity chromatography experiments for cell lines MCF-7, HepG2 and HT-29 and each of the tested conditions. The table shows the total numbers of peptide spectrum matches for each protein in a particular experiment.

**Table S2: The 20 top candidate proteins' lists.** The MS data from representative RNA-centric affinity chromatography experiments for cell lines MCF-7, HepG2 and HT-29 and each of the tested conditions are included in the table. The table shows total numbers of MS matches for each candidate protein. In the lists, hnRNP K is marked in red. Additionally, MS data for HMGB1 protein is marked in green and in the case of HepG2 cells, the positions of HMGB1 protein in the lists are indicated.

Fig S1

MCF-7 cells

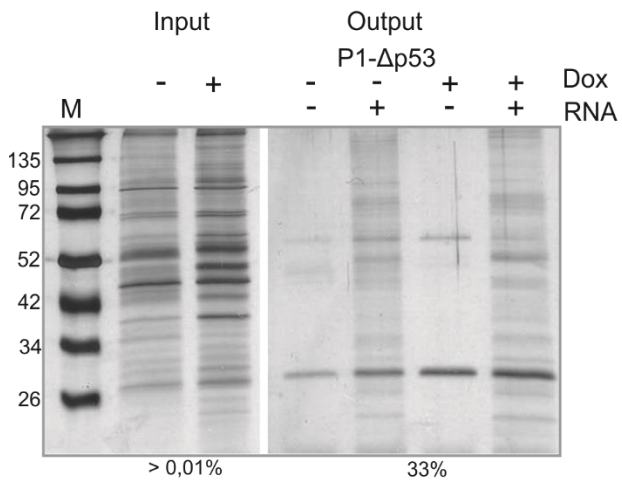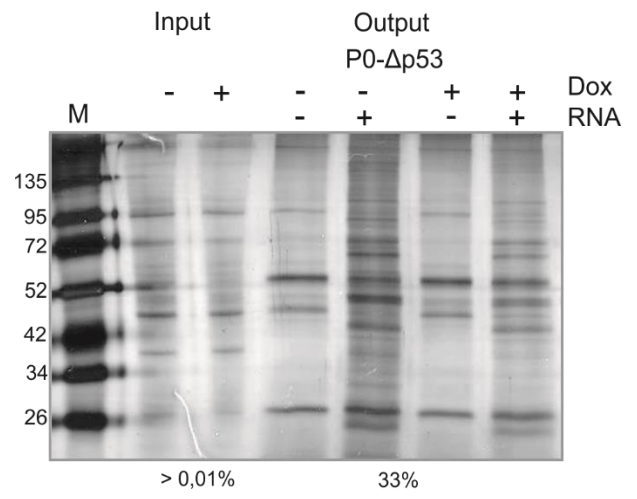

Fig S2

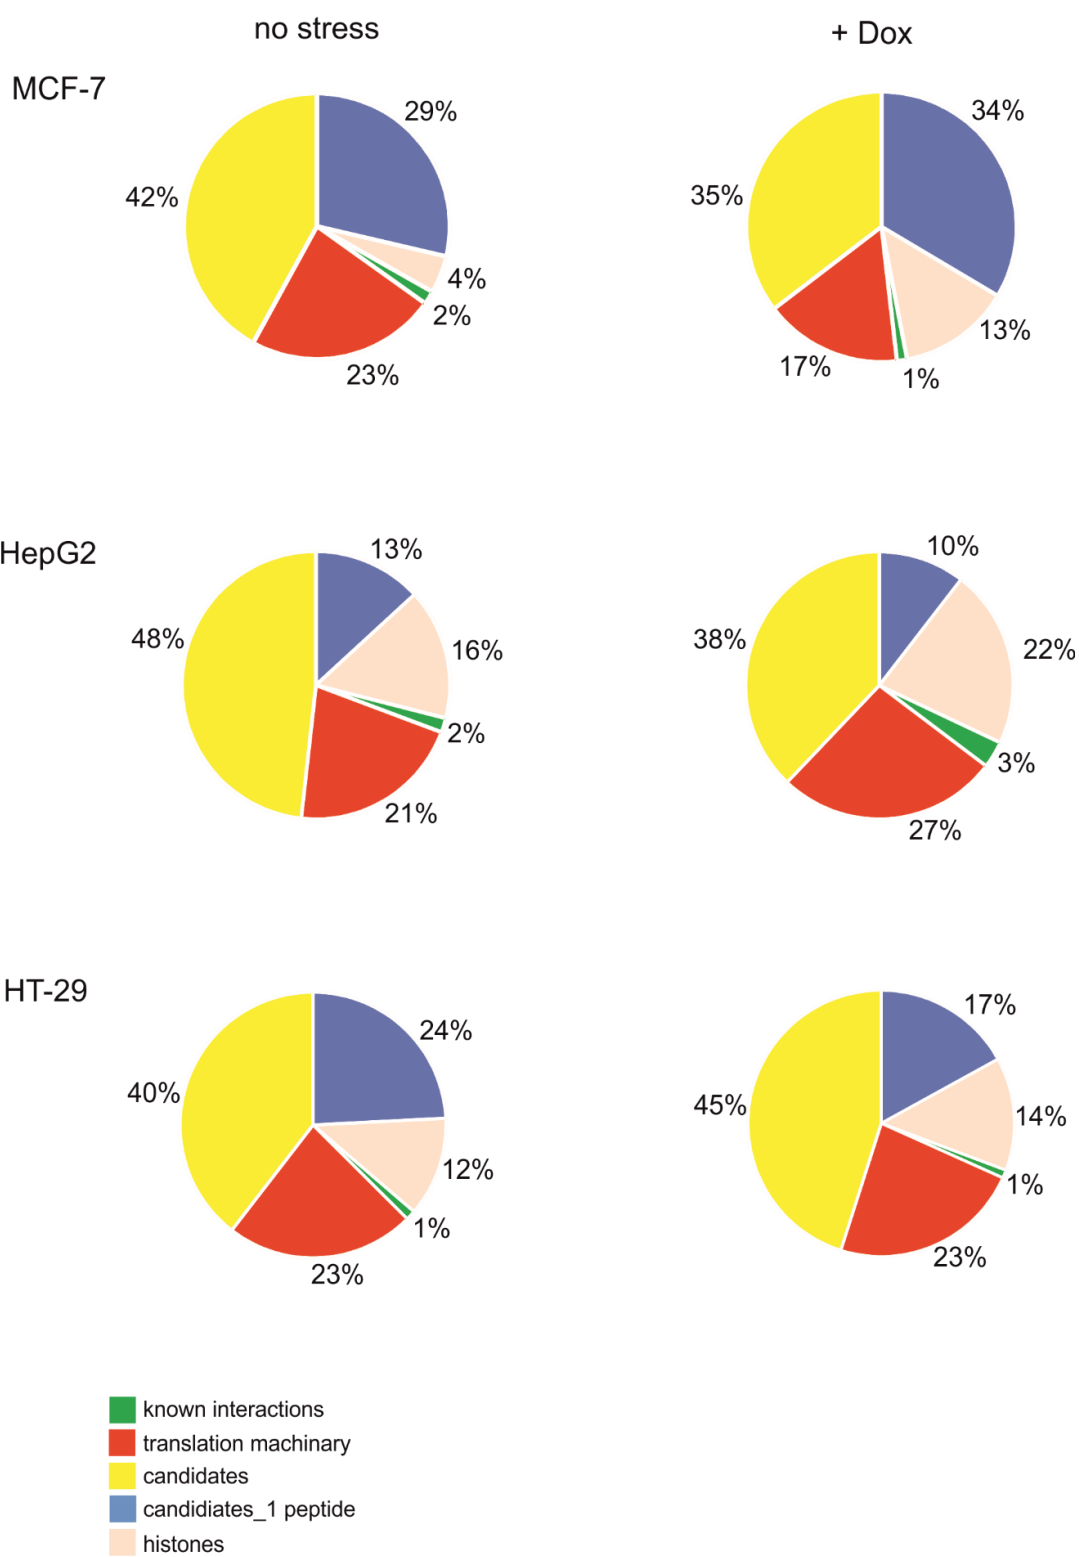

Fig S3

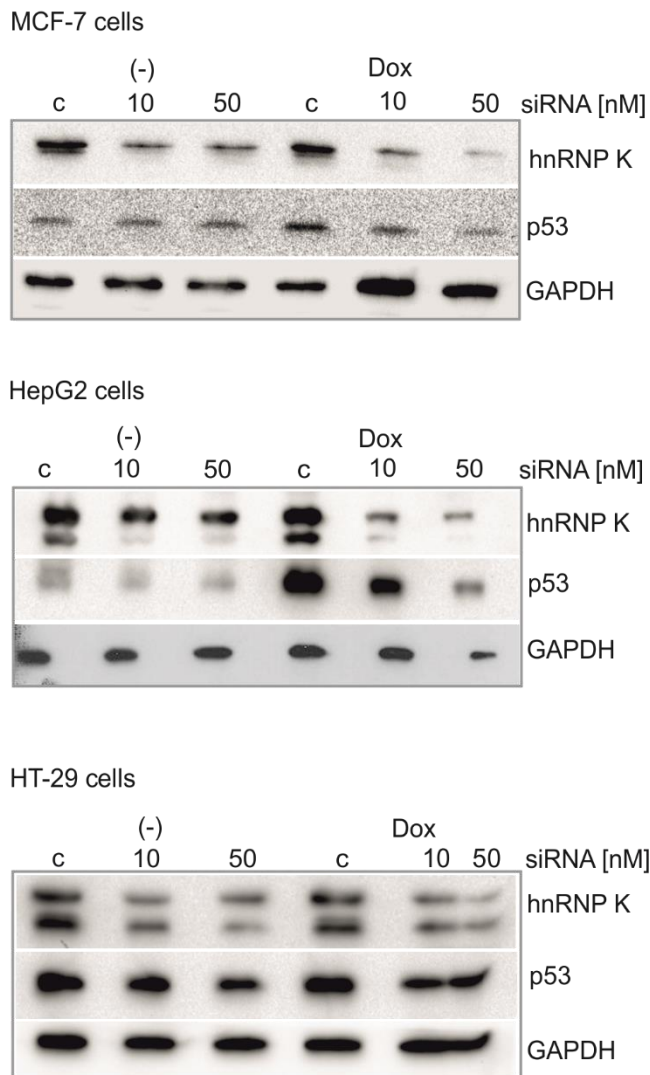

Fig S4

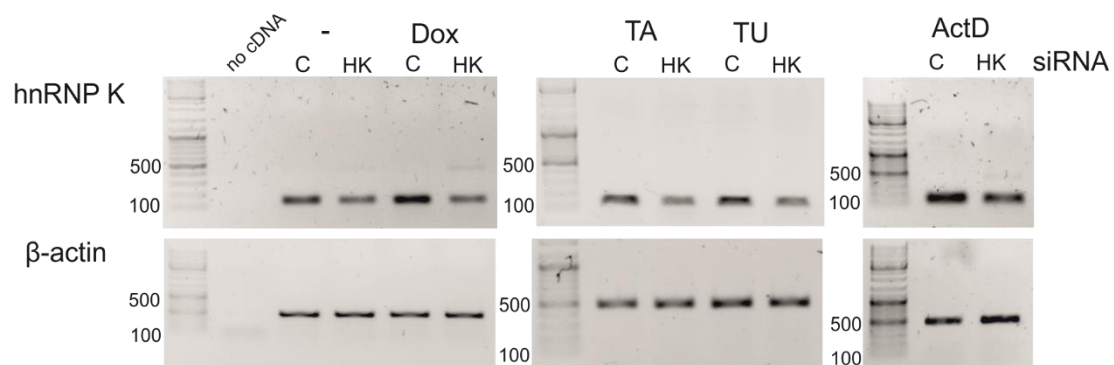

Fig S5

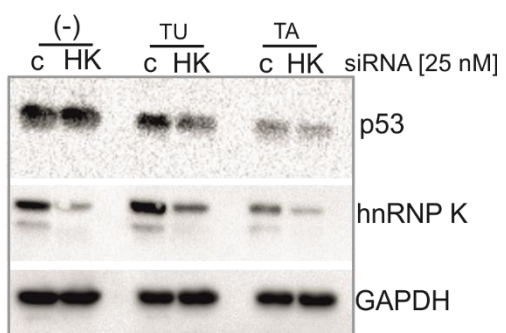



Fig S6

A

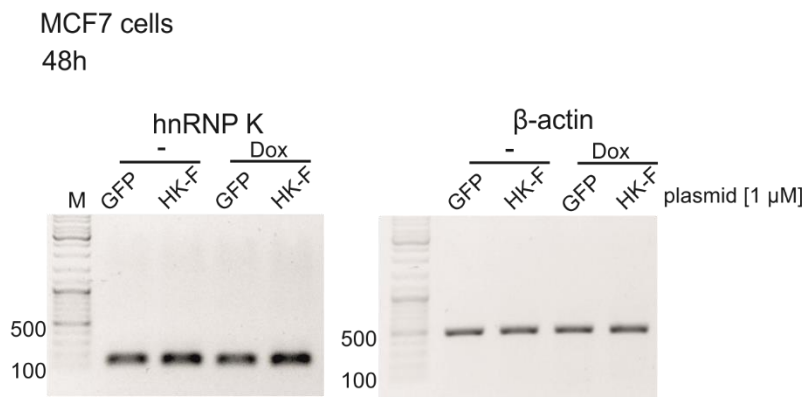

B

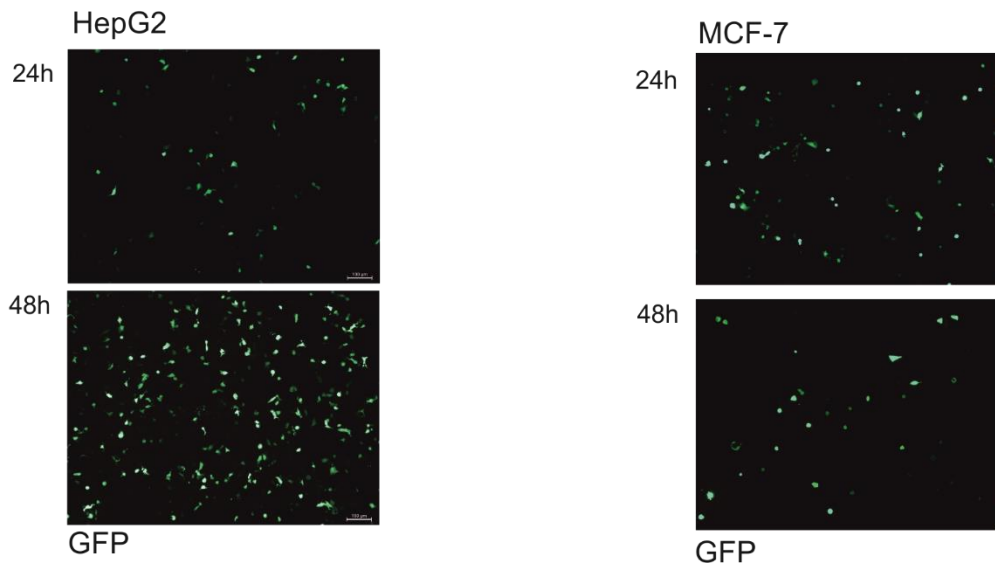

Fig S7

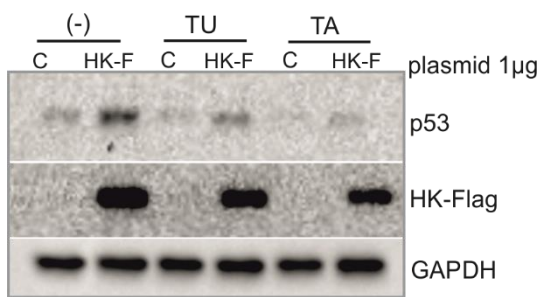

Fig S8

>TP53\_1 -700 to 261

```

-700 TGCAGAGGGCGCAGCAGGTCTTGCACCTCTTCTGCATCTCATTCTCCAGGCTTCAGACCTGTCTCCCTCATTCAAAAAATTTATTATCGAGCTCTTAC -601
      CpG Island -1028 to -683
-600 TTGCTACCCAGCACTGATATAGGCACTCAGGAATACAACAATGAATAAGATAGTAGAAAAATCTATATCCTCATAAGGCTTACGTTTCCATGTAAGTAA -501
-500 AGCAATGAACAAATAAATCTTATCAGAGTGATAAGGGTTGTGAAGGAGATTAATAAGATGGTGTGATATAAAGTATCTGGGAGAAAACGTTAGGGTGTG -401
      BCL6
-400 ATATTACGGAAAGCCTTCTAAAAAATGACATTTAACTGATGAGAAGAAAGGATCCAGCTGAGAGCAAACGCAAAGCTTTCTTCCCTCCACCCTTCAT -301
      EBS
-300 ATTTGACACAATGCAGGATTCCTCCAAAATGATTTCCACCAATTCTGCCCTCACAGCTCTGGCTTGAGAATTTTCCACCCCAAAATGTTAGTATCTACG -201
      hnRNP K
-200 GCACCAGGTCGGCGAGAATCTGACTCTGCACCTCCTCCCAACTCATTTCCTTGCTTCTCCGGCAGGCGGATTACTTGCCTTACTGTGTCATGGC -101
      AP1      hnRNP K      HOXA5      P0 YY1/NF1
-100 GACTGTCCAGCTTTGTGCCAGGAGCCTCGCAGGGTTGATGGGATTGGGTTTTCCCTTCCCATGTGCTCAAGACTGGCGCTAAAAAGTTTTGAGCTTCTC -1
      p53/p73      NFkB and Btf(CPE)      hnRNP K      hPitx1      p53/p73      p53/p73
+1 AAAAGTCTAGAGCCACCGTCCAGGGAGCAGGTAGCTGCTGGGCTCCGGGGACACTTTGCGTTCCGGCTGGGAGCGTGCTTCCACGACGGTGACACGCTT 100
      P1      hPitx1      Myc/Max;USF      E2F1      PAX
101 CCCTGGATTGGCAGCCAGACTGCCTCCGGGCTACTGCCATGGAGGAGCCGCAGTCAGATCCTAGCGTCGAGCCCCCTCTGAGTCAGGAAACATTTTCAG 200
201 ACCTATGGAAACTACTTCTGAAAAACAACGTTCTGTCCCCCTTGCCGTCCCAAGCAATGGA... 261

```

**Table S1**

| Cell lines      |                    | MCF-7     |     |           |     | HepG2     |     |           |     | HT-29     |     |           |     |
|-----------------|--------------------|-----------|-----|-----------|-----|-----------|-----|-----------|-----|-----------|-----|-----------|-----|
| ID<br>UniProtKB | Proteins           | P1-Δ40p53 |     | P0-Δ40p53 |     | P1-Δ40p53 |     | P0-Δ40p53 |     | P1-Δ40p53 |     | P0-Δ40p53 |     |
|                 |                    | (-)       | Dox |
| <b>P19388</b>   | <b>Nucleolin</b>   | 61        | 62  | 70        | 100 | 108       | 129 | 105       | 86  | 91        | 113 | 89        | 93  |
| <b>P26599</b>   | <b>PTB1</b>        | 25        | 15  | 25        | 17  | 32        | 12  | 21        | 11  | 39        | 22  | 26        | 23  |
| <b>Q9UKA9</b>   | <b>PTB2</b>        | 4         | -   | 6         | 2   | 4         | 3   | 2         | 2   | 4         | 3   | 2         | 3   |
| <b>O95758</b>   | <b>PTB3</b>        | -         | 3   | 9         | -   | 9         | 6   | 5         | 6   | 12        | 11  | 7         | 5   |
| <b>P07910</b>   | <b>hnRNP C1/C2</b> | 2         | 1   | 1         | -   | -         | -   | -         | 3   | 1         | -   | 1         | -   |
| <b>P04637</b>   | <b>p53</b>         | -         | -   | -         | -   | -         | -   | -         | -   | 8         | 2   | 2         | 4   |

**Table S2**  
**MCF-7**

| <b>P1-Δ40p53_no stress</b> |               |                                                       |                           |
|----------------------------|---------------|-------------------------------------------------------|---------------------------|
| <b>No.</b>                 | <b>ID</b>     | <b>Protein</b>                                        | <b>MS spectra numbers</b> |
| 1                          | <b>P61978</b> | <b>Heterogeneous nuclear ribonucleoprotein K</b>      | <b>51</b>                 |
| 2                          | P12956        | X-ray repair cross-complementing protein 6            | 45                        |
| 3                          | P22626        | Heterogeneous nuclear ribonucleoproteins A2/B1        | 37                        |
| 4                          | Q12906        | Interleukin enhancer-binding factor 3                 | 35                        |
| 5                          | P13010        | X-ray repair cross-complementing protein 5            | 33                        |
| 6                          | Q9UQ80        | Proliferation-associated protein 2G4                  | 32                        |
| 7                          | Q12905        | Interleukin enhancer-binding factor 2                 | 30                        |
| 8                          | Q15366        | Poly(rC)-binding protein 2                            | 29                        |
| 9                          | P09651        | Heterogeneous nuclear ribonucleoprotein A1            | 28                        |
| 10                         | Q15365        | Poly(rC)-binding protein 1                            | 28                        |
| 11                         | Q14103        | Heterogeneous nuclear ribonucleoprotein D0            | 27                        |
| 12                         | Q08211        | ATP-dependent RNA helicase A                          | 27                        |
| 13                         | P05455        | Lupus La protein                                      | 25                        |
| 14                         | O95793        | Double-stranded RNA-binding protein Staufen homolog 1 | 23                        |
| 15                         | Q13283        | Ras GTPase-activating protein-binding protein 1       | 22                        |
| 16                         | <b>P09429</b> | <b>High mobility group protein B1</b>                 | <b>22</b>                 |
| 17                         | O60506        | Heterogeneous nuclear ribonucleoprotein Q             | 21                        |
| 18                         | Q99729        | Heterogeneous nuclear ribonucleoprotein A/B           | 19                        |
| 19                         | P11940        | Polyadenylate-binding protein 1                       | 18                        |
| 20                         | P51991        | Heterogeneous nuclear ribonucleoprotein A3            | 17                        |

  

| <b>P1-Δ40p53_dox</b> |               |                                                       |                           |
|----------------------|---------------|-------------------------------------------------------|---------------------------|
| <b>No.</b>           | <b>ID</b>     | <b>Protein</b>                                        | <b>MS spectra numbers</b> |
| 1                    | Q15365        | Poly(rC)-binding protein 1                            | 43                        |
| 2                    | P12956        | X-ray repair cross-complementing protein 6            | 40                        |
| 3                    | Q9UQ80        | Proliferation-associated protein 2G4                  | 39                        |
| 4                    | P13010        | X-ray repair cross-complementing protein 5            | 39                        |
| 5                    | Q13283        | Ras GTPase-activating protein-binding protein 1       | 38                        |
| 6                    | <b>P61978</b> | <b>Heterogeneous nuclear ribonucleoprotein K</b>      | <b>33</b>                 |
| 7                    | <b>P09429</b> | <b>High mobility group protein B1</b>                 | <b>29</b>                 |
| 8                    | Q15366        | Poly(rC)-binding protein 2                            | 26                        |
| 9                    | Q12905        | Interleukin enhancer-binding factor 2                 | 25                        |
| 10                   | Q08211        | ATP-dependent RNA helicase A                          | 25                        |
| 11                   | O95793        | Double-stranded RNA-binding protein Staufen homolog 1 | 22                        |
| 12                   | P11940        | Polyadenylate-binding protein 1                       | 22                        |
| 13                   | Q99729        | Heterogeneous nuclear ribonucleoprotein A/B           | 21                        |
| 14                   | P62826        | GTP-binding nuclear protein Ran                       | 21                        |
| 15                   | Q14103        | Heterogeneous nuclear ribonucleoprotein D0            | 19                        |
| 16                   | P09651        | Heterogeneous nuclear ribonucleoprotein A1-like 2     | 19                        |
| 17                   | P09651        | Heterogeneous nuclear ribonucleoprotein A1            | 19                        |

|    |        |                                           |    |
|----|--------|-------------------------------------------|----|
| 18 | P57721 | Poly(rC)-binding protein 3                | 19 |
| 19 | Q9BRP8 | Partner of Y14 and mago                   | 18 |
| 20 | O60506 | Heterogeneous nuclear ribonucleoprotein Q | 18 |

#### P0-Δ40p53\_no stress

| No. | ID            | Protein                                          | MS spectra numbers |
|-----|---------------|--------------------------------------------------|--------------------|
| 1   | P12956        | X-ray repair cross-complementing protein 6       | 84                 |
| 2   | <b>P61978</b> | <b>Heterogeneous nuclear ribonucleoprotein K</b> | <b>79</b>          |
| 3   | <b>P09429</b> | <b>High mobility group protein B1</b>            | <b>75</b>          |
| 4   | P13010        | X-ray repair cross-complementing protein 5       | 65                 |
| 5   | P09651        | Heterogeneous nuclear ribonucleoprotein A1       | 62                 |
| 6   | P22626        | Heterogeneous nuclear ribonucleoproteins A2/B1   | 57                 |
| 7   | Q15365        | Poly(rC)-binding protein 1                       | 55                 |
| 8   | Q96AE4        | Far upstream element-binding protein 1           | 53                 |
| 9   | Q13283        | Ras GTPase-activating protein-binding protein 1  | 51                 |
| 10  | Q12906        | Interleukin enhancer-binding factor 3            | 48                 |
| 11  | Q9UQ80        | Proliferation-associated protein 2G4             | 46                 |
| 12  | P26583        | High mobility group protein B2                   | 46                 |
| 13  | O60506        | Heterogeneous nuclear ribonucleoprotein Q        | 44                 |
| 14  | P17844        | Probable ATP-dependent RNA helicase DDX5         | 39                 |
| 15  | Q15366        | Poly(rC)-binding protein 2                       | 34                 |
| 16  | P11940        | Polyadenylate-binding protein 1                  | 32                 |
| 17  | Q92841        | Probable ATP-dependent RNA helicase DDX17        | 32                 |
| 18  | Q96I24        | Far upstream element-binding protein 3           | 29                 |
| 19  | P05455        | Lupus La protein                                 | 28                 |
| 20  | Q14103        | Heterogeneous nuclear ribonucleoprotein D0       | 28                 |

#### P0-Δ40p53\_dox

| No. | ID            | Protein                                          | MS spectra numbers |
|-----|---------------|--------------------------------------------------|--------------------|
| 1   | <b>P61978</b> | <b>Heterogeneous nuclear ribonucleoprotein K</b> | <b>105</b>         |
| 2   | Q96AE4        | Far upstream element-binding protein 1           | 49                 |
| 3   | P22626        | Heterogeneous nuclear ribonucleoproteins A2/B1   | 45                 |
| 4   | Q9UQ80        | Proliferation-associated protein 2G4             | 36                 |
| 5   | P11940        | Polyadenylate-binding protein 1                  | 35                 |
| 6   | <b>P09429</b> | <b>High mobility group protein B1</b>            | <b>33</b>          |
| 7   | P09651        | Heterogeneous nuclear ribonucleoprotein A1       | 30                 |
| 8   | P06748        | Nucleophosmin                                    | 28                 |
| 9   | Q99729        | Heterogeneous nuclear ribonucleoprotein A/B      | 27                 |
| 10  | Q92945        | Far upstream element-binding protein 2           | 25                 |
| 11  | P62826        | GTP-binding nuclear protein Ran                  | 24                 |
| 12  | P12956        | X-ray repair cross-complementing protein 6       | 24                 |
| 13  | O15347        | High mobility group protein B3                   | 20                 |
| 14  | Q12906        | Interleukin enhancer-binding factor 3            | 15                 |
| 15  | P31943        | Heterogeneous nuclear ribonucleoprotein H        | 14                 |
| 16  | P05455        | Lupus La protein                                 | 13                 |
| 17  | Q14103        | Heterogeneous nuclear ribonucleoprotein D0       | 12                 |

|    |        |                                           |    |
|----|--------|-------------------------------------------|----|
| 18 | Q13310 | Polyadenylate-binding protein 4           | 10 |
| 19 | O60506 | Heterogeneous nuclear ribonucleoprotein Q | 9  |
| 20 | P27695 | DNA-(apurinic or apyrimidinic site) lyase | 9  |

## HepG2

### P1-Δ40p53\_no stress

| No. | ID            | Protein                                               | MS spectra numbers |
|-----|---------------|-------------------------------------------------------|--------------------|
| 1   | P12956        | X-ray repair cross-complementing protein 6            | 112                |
| 2   | <b>P61978</b> | <b>Heterogeneous nuclear ribonucleoprotein K</b>      | <b>76</b>          |
| 3   | Q12906        | Interleukin enhancer-binding factor 3                 | 73                 |
| 4   | P67809        | Nuclease-sensitive element-binding protein 1          | 73                 |
| 5   | P09651        | Heterogeneous nuclear ribonucleoprotein A1            | 61                 |
| 6   | P22626        | Heterogeneous nuclear ribonucleoproteins A2/B1        | 58                 |
| 7   | P13010        | X-ray repair cross-complementing protein 5            | 57                 |
| 8   | Q32P51        | Heterogeneous nuclear ribonucleoprotein A1-like 2     | 50                 |
| 9   | P62826        | GTP-binding nuclear protein Ran                       | 49                 |
| 10  | Q14103        | Heterogeneous nuclear ribonucleoprotein D0            | 43                 |
| 11  | O95793        | Double-stranded RNA-binding protein Staufen homolog 1 | 40                 |
| 12  | P16989        | Y-box-binding protein 3                               | 40                 |
| 13  | Q9NZI8        | Insulin-like growth factor 2 mRNA-binding protein 1   | 38                 |
| 14  | Q12905        | Interleukin enhancer-binding factor 2                 | 37                 |
| 15  | P46777        | 60S ribosomal protein L5                              | 37                 |
| 16  | Q96AE4        | Far upstream element-binding protein 1                | 34                 |
| 17  | Q9Y2T7        | Y-box-binding protein 2                               | 29                 |
| 18  | P51991        | Heterogeneous nuclear ribonucleoprotein A3            | 29                 |
| 19  | P05455        | Lupus La protein                                      | 27                 |
| 20  | Q92945        | Far upstream element-binding protein 2                | 22                 |

### P1-Δ40p53\_dox

| No. | ID            | Protein                                               | MS spectra numbers |
|-----|---------------|-------------------------------------------------------|--------------------|
| 1   | Q9NZI8        | Insulin-like growth factor 2 mRNA-binding protein 1   | 51                 |
| 2   | P12956        | X-ray repair cross-complementing protein 6            | 48                 |
| 3   | P22626        | Heterogeneous nuclear ribonucleoproteins A2/B1        | 42                 |
| 4   | O95793        | Double-stranded RNA-binding protein Staufen homolog 1 | 42                 |
| 5   | Q12906        | Interleukin enhancer-binding factor 3                 | 38                 |
| 6   | P09651        | Heterogeneous nuclear ribonucleoprotein A1            | 38                 |
| 7   | P67809        | Nuclease-sensitive element-binding protein 1          | 37                 |
| 8   | <b>P61978</b> | <b>Heterogeneous nuclear ribonucleoprotein K</b>      | <b>37</b>          |
| 9   | Q14103        | Heterogeneous nuclear ribonucleoprotein D0            | 36                 |
| 10  | Q32P51        | Heterogeneous nuclear ribonucleoprotein A1-like 2     | 32                 |
| 11  | P62826        | GTP-binding nuclear protein Ran                       | 32                 |
| 12  | P13010        | X-ray repair cross-complementing protein 5            | 28                 |
| 13  | P16989        | Y-box-binding protein 3                               | 24                 |
| 14  | O00425        | Insulin-like growth factor 2 mRNA-binding protein 3   | 24                 |
| 15  | Q9Y2T7        | Y-box-binding protein 2                               | 21                 |
| 16  | P11940        | Polyadenylate-binding protein 1                       | 19                 |

|    |               |                                                     |           |
|----|---------------|-----------------------------------------------------|-----------|
| 17 | P51991        | Heterogeneous nuclear ribonucleoprotein A3          | 19        |
| 18 | Q96AE4        | Far upstream element-binding protein 1              | 18        |
| 19 | Q9Y6M1        | Insulin-like growth factor 2 mRNA-binding protein 2 | 17        |
| 20 | P06748        | Nucleophosmin                                       | 16        |
| .  | .             | .                                                   | .         |
| 25 | <b>P09429</b> | <b>High mobility group protein B1</b>               | <b>12</b> |

**P0-Δ40p53\_no stress**

| No. | ID            | Protein                                               | MS spectra numbers |
|-----|---------------|-------------------------------------------------------|--------------------|
| 1   | P12956        | X-ray repair cross-complementing protein 6            | 105                |
| 2   | <b>P61978</b> | <b>Heterogeneous nuclear ribonucleoprotein K</b>      | <b>94</b>          |
| 3   | P67809        | Nuclease-sensitive element-binding protein 1          | 62                 |
| 4   | Q9NZI8        | Insulin-like growth factor 2 mRNA-binding protein 1   | 62                 |
| 5   | Q12906        | Interleukin enhancer-binding factor 3                 | 61                 |
| 6   | P09651        | Heterogeneous nuclear ribonucleoprotein A1            | 58                 |
| 7   | P22626        | Heterogeneous nuclear ribonucleoproteins A2/B1        | 55                 |
| 8   | Q96AE4        | Far upstream element-binding protein 1                | 53                 |
| 9   | Q92945        | Far upstream element-binding protein 2                | 47                 |
| 10  | Q32P51        | Heterogeneous nuclear ribonucleoprotein A1-like 2     | 45                 |
| 11  | P13010        | X-ray repair cross-complementing protein 5            | 44                 |
| 12  | Q14103        | Heterogeneous nuclear ribonucleoprotein D0            | 43                 |
| 13  | O95793        | Double-stranded RNA-binding protein Staufen homolog 1 | 43                 |
| 14  | P11940        | Polyadenylate-binding protein 1                       | 40                 |
| 15  | P16989        | Y-box-binding protein 3                               | 32                 |
| 16  | P62826        | GTP-binding nuclear protein Ran                       | 31                 |
| 17  | P51991        | Heterogeneous nuclear ribonucleoprotein A3            | 31                 |
| 18  | Q12905        | Interleukin enhancer-binding factor 2                 | 30                 |
| 19  | P46777        | 60S ribosomal protein L5                              | 29                 |
| 20  | Q9Y2T7        | Y-box-binding protein 2                               | 26                 |

**P0-Δ40p53\_dox**

| No. | ID            | Protein                                               | MS spectra numbers |
|-----|---------------|-------------------------------------------------------|--------------------|
| 1   | P12956        | X-ray repair cross-complementing protein 6            | 87                 |
| 2   | <b>P61978</b> | <b>Heterogeneous nuclear ribonucleoprotein K</b>      | <b>55</b>          |
| 3   | Q12906        | Interleukin enhancer-binding factor 3                 | 42                 |
| 4   | P67809        | Nuclease-sensitive element-binding protein 1          | 40                 |
| 5   | P09651        | Heterogeneous nuclear ribonucleoprotein A1            | 40                 |
| 6   | Q14103        | Heterogeneous nuclear ribonucleoprotein D0            | 36                 |
| 7   | P13010        | X-ray repair cross-complementing protein 5            | 35                 |
| 8   | P22626        | Heterogeneous nuclear ribonucleoproteins A2/B1        | 33                 |
| 9   | Q9NZI8        | Insulin-like growth factor 2 mRNA-binding protein 1   | 31                 |
| 10  | P62826        | GTP-binding nuclear protein Ran                       | 31                 |
| 11  | Q32P51        | Heterogeneous nuclear ribonucleoprotein A1-like 2     | 31                 |
| 12  | Q96AE4        | Far upstream element-binding protein 1                | 31                 |
| 13  | O95793        | Double-stranded RNA-binding protein Staufen homolog 1 | 30                 |
| 14  | P16989        | Y-box-binding protein 3                               | 22                 |
| 15  | P11940        | Polyadenylate-binding protein 1                       | 21                 |



|    |               |                                            |           |
|----|---------------|--------------------------------------------|-----------|
| 16 | Q92945        | Far upstream element-binding protein 2     | 18        |
| 17 | Q9Y2T7        | Y-box-binding protein 2                    | 16        |
| 18 | Q12905        | Interleukin enhancer-binding factor 2      | 15        |
| 19 | P51991        | Heterogeneous nuclear ribonucleoprotein A3 | 14        |
| 20 | Q13310        | Polyadenylate-binding protein 4            | 14        |
| .  | .             | .                                          | .         |
| 22 | <b>P09429</b> | <b>High mobility group protein B1</b>      | <b>13</b> |

## HT-29

| P1-Δ40p53_no stress |               |                                                   |                    |
|---------------------|---------------|---------------------------------------------------|--------------------|
| No.                 | ID            | Protein                                           | MS spectra numbers |
| 1                   | <b>P61978</b> | <b>Heterogeneous nuclear ribonucleoprotein K</b>  | <b>103</b>         |
| 2                   | <b>P09429</b> | <b>High mobility group protein B1</b>             | <b>96</b>          |
| 3                   | P22626        | Heterogeneous nuclear ribonucleoproteins A2/B1    | 82                 |
| 4                   | P09651        | Heterogeneous nuclear ribonucleoprotein A1        | 75                 |
| 5                   | B2RPK0        | Putative high mobility group protein B1-like 1    | 74                 |
| 6                   | Q32P51        | Heterogeneous nuclear ribonucleoprotein A1-like 2 | 64                 |
| 7                   | Q14103        | Heterogeneous nuclear ribonucleoprotein D0        | 61                 |
| 8                   | Q9UQ80        | Proliferation-associated protein 2G4              | 56                 |
| 9                   | P26583        | High mobility group protein B2                    | 49                 |
| 10                  | Q96AE4        | Far upstream element-binding protein 1            | 47                 |
| 11                  | O60506        | Heterogeneous nuclear ribonucleoprotein Q         | 45                 |
| 12                  | P62826        | GTP-binding nuclear protein Ran                   | 41                 |
| 13                  | Q15366        | Poly(rC)-binding protein 2                        | 36                 |
| 14                  | Q13838        | Spliceosome RNA helicase DDX39B                   | 35                 |
| 15                  | Q15365        | Poly(rC)-binding protein 1                        | 34                 |
| 16                  | P17844        | Probable ATP-dependent RNA helicase DDX5          | 29                 |
| 17                  | Q13283        | Ras GTPase-activating protein-binding protein 1   | 27                 |
| 18                  | Q92945        | Far upstream element-binding protein 2            | 27                 |
| 19                  | Q92841        | Probable ATP-dependent RNA helicase DDX17         | 27                 |
| 20                  | Q14258        | E3 ubiquitin/ISG15 ligase TRIM25                  | 27                 |

| P1-Δ40p53_dox |               |                                                   |                    |
|---------------|---------------|---------------------------------------------------|--------------------|
| No.           | ID            | Protein                                           | MS spectra numbers |
| 1             | <b>P61978</b> | <b>Heterogeneous nuclear ribonucleoprotein K</b>  | <b>99</b>          |
| 2             | <b>P09429</b> | <b>High mobility group protein B1</b>             | <b>89</b>          |
| 3             | P09651        | Heterogeneous nuclear ribonucleoprotein A1        | 85                 |
| 4             | P22626        | Heterogeneous nuclear ribonucleoproteins A2/B1    | 82                 |
| 5             | Q32P51        | Heterogeneous nuclear ribonucleoprotein A1-like 2 | 75                 |
| 6             | B2RPK0        | Putative high mobility group protein B1-like 1    | 67                 |
| 7             | Q9UQ80        | Proliferation-associated protein 2G4              | 53                 |
| 8             | P26583        | High mobility group protein B2                    | 52                 |
| 9             | Q14103        | Heterogeneous nuclear ribonucleoprotein D0        | 46                 |
| 10            | Q96AE4        | Far upstream element-binding protein 1            | 43                 |
| 11            | P62826        | GTP-binding nuclear protein Ran                   | 41                 |

|    |        |                                              |    |
|----|--------|----------------------------------------------|----|
| 12 | P17844 | Probable ATP-dependent RNA helicase DDX5     | 40 |
| 13 | P12956 | X-ray repair cross-complementing protein 6   | 38 |
| 14 | O60506 | Heterogeneous nuclear ribonucleoprotein Q    | 30 |
| 15 | P06748 | Nucleophosmin                                | 29 |
| 16 | P51991 | Heterogeneous nuclear ribonucleoprotein A3   | 29 |
| 17 | P67809 | Nuclease-sensitive element-binding protein 1 | 26 |
| 18 | Q15366 | Poly(rC)-binding protein 2                   | 23 |
| 19 | P13010 | X-ray repair cross-complementing protein 5   | 22 |
| 20 | Q13838 | Spliceosome RNA helicase DDX39B              | 22 |

**P0-Δ40p53\_no stress**

| No. | ID            | Protein                                               | MS spectra numbers |
|-----|---------------|-------------------------------------------------------|--------------------|
| 1   | <b>P61978</b> | <b>Heterogeneous nuclear ribonucleoprotein K</b>      | <b>104</b>         |
| 2   | <b>P09429</b> | <b>High mobility group protein B1</b>                 | <b>95</b>          |
| 3   | B2RPK0        | Putative high mobility group protein B1-like 1        | 69                 |
| 4   | P22626        | Heterogeneous nuclear ribonucleoproteins A2/B1        | 67                 |
| 5   | P26583        | High mobility group protein B2                        | 64                 |
| 6   | P09651        | Heterogeneous nuclear ribonucleoprotein A1            | 62                 |
| 7   | Q32P51        | Heterogeneous nuclear ribonucleoprotein A1-like 2     | 53                 |
| 8   | Q14103        | Heterogeneous nuclear ribonucleoprotein D0            | 42                 |
| 9   | Q96AE4        | Far upstream element-binding protein 1                | 41                 |
| 10  | Q9UQ80        | Proliferation-associated protein 2G4                  | 36                 |
| 11  | O60506        | Heterogeneous nuclear ribonucleoprotein Q             | 34                 |
| 12  | P62826        | GTP-binding nuclear protein Ran                       | 31                 |
| 13  | Q15365        | Poly(rC)-binding protein 1                            | 31                 |
| 14  | Q8NC51        | Plasminogen activator inhibitor 1 RNA-binding protein | 30                 |
| 15  | Q13283        | Ras GTPase-activating protein-binding protein 1       | 29                 |
| 16  | Q15366        | Poly(rC)-binding protein 2                            | 28                 |
| 17  | P20290        | Transcription factor BTF3                             | 26                 |
| 18  | P12956        | X-ray repair cross-complementing protein 6            | 21                 |
| 19  | P31943        | Heterogeneous nuclear ribonucleoprotein H             | 21                 |
| 20  | Q13765        | Nascent polypeptide-associated complex subunit alpha  | 21                 |

**P0-Δ40p53\_dox**

| No. | ID            | Protein                                           | MS spectra numbers |
|-----|---------------|---------------------------------------------------|--------------------|
| 1   | <b>P09429</b> | <b>High mobility group protein B1</b>             | <b>116</b>         |
| 2   | <b>P61978</b> | <b>Heterogeneous nuclear ribonucleoprotein K</b>  | <b>105</b>         |
| 3   | B2RPK0        | Putative high mobility group protein B1-like 1    | 89                 |
| 4   | P09651        | Heterogeneous nuclear ribonucleoprotein A1        | 81                 |
| 5   | P22626        | Heterogeneous nuclear ribonucleoproteins A2/B1    | 76                 |
| 6   | Q32P51        | Heterogeneous nuclear ribonucleoprotein A1-like 2 | 68                 |
| 7   | P26583        | High mobility group protein B2                    | 56                 |
| 8   | Q96AE4        | Far upstream element-binding protein 1            | 47                 |
| 9   | Q9UQ80        | Proliferation-associated protein 2G4              | 44                 |
| 10  | Q14103        | Heterogeneous nuclear ribonucleoprotein D0        | 41                 |
| 11  | P52597        | Heterogeneous nuclear ribonucleoprotein F         | 34                 |

|           |        |                                            |    |
|-----------|--------|--------------------------------------------|----|
| <b>12</b> | O60506 | Heterogeneous nuclear ribonucleoprotein Q  | 32 |
| <b>13</b> | P62826 | GTP-binding nuclear protein Ran            | 31 |
| <b>14</b> | P17844 | Probable ATP-dependent RNA helicase DDX5   | 30 |
| <b>15</b> | Q15366 | Poly(rC)-binding protein 2                 | 29 |
| <b>16</b> | P12956 | X-ray repair cross-complementing protein 6 | 29 |
| <b>17</b> | Q15365 | Poly(rC)-binding protein 1                 | 27 |
| <b>18</b> | P51991 | Heterogeneous nuclear ribonucleoprotein A3 | 26 |
| <b>19</b> | P06748 | Nucleophosmin                              | 23 |
| <b>20</b> | P23497 | Nuclear autoantigen Sp-100                 | 23 |
